# Supplementary material for: Alcohol attenuates CRF-induced excitatory effects from the extended amygdala to dorsostriatal cholinergic interneurons
Source: eLife. 2026 Mar 23;14:RP107145. doi: 10.7554/eLife.107145 (PMC13008356; doi:10.7554/eLife.107145)
Supplement: Source data 1. [file elife-107145-data1.xlsx]

## Sheet: Fig 1
	CeA	BNST
	cells/mm^2	cells/mm^2
	12	48
	16	56
	12	88
	20	128
	16	128
	28	104
	24	112
	44	96
	20	72
	48	64
	16	64
	16	64
	12	120
		72
		24

## Sheet: Fig 2
	DS	CeA	BNST
	cells/mm^2	cells/mm^2	cells/mm^2
	0.1	344	392
	0.3	524	480
	0.6	272	128
	0.8	440	296
	1.3	296	128
	1.4	600	336
	0.5	464	432
	0.7	460	208
	0.1	396	120
	0.2	272	176
	1.3	448	272
	0.6	480	168
	0.8	348	136
	0.7	256	296
	0.8	284	144
	0.8	244
	0.6	260
	0.8	288
	0.8	342
	0.8	248
	1
	1
	2.2
	1
	1.8
	1.2
	2.2
	0.8
	2.2

## Sheet: Fig 3
Fig 3D
	CeA	BNST
	316	328
	480	400
	556	584
	296	616
	388	152
	600	112
	464	328
	460	408
	396
Fig 3E
	CeA	BNST
	22.7848	82.9268
	25	68
	20.1439	42.4657
	12.1622	29.8701
	16.4948	42.1053
	23.3333	42.8571
	8.62069	46.3415
	6.08696	33.3333
	2.0202
Fig 3F
	CeA	BNST
	72	272
	120	272
	112	248
	36	184
	64	64
	140	48
	40	152
	28	136
	8
Fig 3I
		BL	TTX	TTX+4-AP	Bic
	Cell 1	13.6183	1.34121	92.3089	3.05366
	Cell 2	7.91408	2.12158	23.7531	1.69545
	Cell 3	27.6129	1.68785	86.3504	11.1828
	Cell 4	20.9095	2.17742	74.7493	2.19112
	Cell 5	94.5449	1.04357	168.622	8.38444
	Cell 6	314.466	4.11554	522.194	111.904
	Cell 7	14.8541	1.98624	16.9364	3.82558
	Cell 8	306.08	0.69909	174.275	2.84952
Fig 3J
	Onset latency
	5.7
	5
	6.8
	6.5
	6.5
	6.9
	5.6
	3.8

## Sheet: Fig 4
Fig 4B
	ChAT+	ChAT+ & CRFR1+
	111	29
	99	23
	57	29
	66	30
	47	27
	65	23
	108	30
	80	10
	56	19
	51	22
	42	20
	49	14
	47	10
	45	7
	31	16
	56	17
	60	13
Fig 4C
	% of CINs that are CRFR1+
	20.7143
	18.8525
	33.7209
	31.25
	36.4865
	26.1364
	21.7391
	11.1111
	25.3333
	30.137
	32.2581
	22.2222
	17.5439
	13.4615
	34.0425
	23.2877
	17.8082
Fig 4E
	% of CINs that are CRFR1+
	13.8614
	10.5263
	9
	12.766
	6.42202
	12.5683
	2.83019
	8.0292
	10.5263
	9.80392
	22.7273
	13.8686
	5.55556
	10.5634
	12.0968
	2.12766
	1.90476
	2.08333
	1.96078
	13.1148
	7.54717
	2.40964
	4.83871
	3.65854
	3
	7.92079
	12.3711
	7.20721
	8.88889
	14.9425
	10.5263
	2.18978
	9.09091
	9.72222
	9.09091

## Sheet: Fig 5
Fig 5C
		BL	CRF	CRF+NBI
	Slice 1	133.787	286.203	85.1849
	Slice 2	126.405	288.832	79.4915
	Slice 3	102.78	299.066	74.5724
	Slice 4	107.662	276.341	80.9635
	Slice 5	98.9372	293.172	80.0799
	Slice 6	93.0217	314.583	74.032
	Slice 7	91.8235	302.107	65.2828
Fig 5F
		BL	CRF
	Slice 1	0	0.08082
	Slice 2	0	0.02251
	Slice 3	0	0.03848
	Slice 4	0	-0.01621
	Slice 5	0	0.13548
	Slice 6	0	0.0151
	Slice 7	0	0.0123
Fig 5I
		Pre	Stim	Post
	Cell 1	100	128.505	69.1885
	Cell 2	100	132.902	82.4822
	Cell 3	100	154.621	51.7664
	Cell 4	100	123.274	55.1353
	Cell 5	100	101.799	64.632
	Cell 6	100	112.394	72.0659
	Cell 7	100	106.536	67.8585
	Cell 8	100	116.561	81.3471
	Cell 9	100	100.387	97.2581
	Cell 10	100	96.2963	88.6364
	Cell 11	100	107.407	40.8832
	Cell 12	100	104.348	39.4649
	Cell 13	100	120.238	36.2637
Fig 5K
		Pre	Stim	Post
	Cell 1	100	105	109.091
	Cell 2	100	116.932	113.43
	Cell 3	100	79.6552	64.8903
	Cell 4	100	114.231	106.094
	Cell 5	100	120.75	126
	Cell 6	100	99.4737	73.2057
	Cell 7	100	96.25	95.4545
	Cell 8	100	91.7523	84.4945
	Cell 9	100	101.379	91.6928

## Sheet: Fig 6
Fig 6B
		pre-EtOH	EtOH
	Cell 1	100	80.5296
	Cell 2	100	66.5436
	Cell 3	100	83.3333
	Cell 4	100	50.6829
	Cell 5	100	72.3634
Fig 6D
		BL	CRF	EtOH
	Cell 1	1.17778	3.52667	3.575
	Cell 2	4.10667	2.80417	die
	Cell 3	3.48333	6.08333	0.26667
	Cell 4	1.71667	5.71667	1.35667
	Cell 5	1.38667	4.13667	die
	Cell 6	3.6	5.69722	4.21389
	Cell 7	3.82917	5.52222	die
	Cell 8	0.7125	3.6	0.38889
	Cell 9	2.12083	4.10833	3.13889
	Cell 10	1.66667	4.26667	3.62917
	Cell 11	2.73	4.94583	3.625
	Cell 12	2.2125	4.37222	3.7
	Cell 13	4.93056	8.20476	7.25667
	Cell 14	2.15	6.86667	2.90278
	Cell 15	1.85333	4.71167	3.7625
	Cell 16	0.79667	5.1	2.91667
	Cell 17	1.92083	4.20417	2.61429
	Cell 18	8.89444	12.1438	12.34
Fig 6E
		BL	CRF	EtOH
	Cell 1	6.86667	4.98333	die
	Cell 2	3.88056	7.87083	7.13333
	Cell 3	4.23333	6.8375	5.38333
	Cell 4	2.65833	3.98333	3.01111
	Cell 5	3.10417	4.47667	3.37222
	Cell 6	2.26111	3.4	2.88
	Cell 7	1.04583	3.3	2.44667
	Cell 8	1.54	3.98889	3.65333
	Cell 9	3.56667	5.67381	3.29524
	Cell 10	1.34792	4.01333	2.87222
	Cell 11	0.85	2.525	1.50278
	Cell 12	2.25	4.22333	4.69444
	Cell 13	4.43958	4.48	3.48611
	Cell 14	2.71875	2.77	3.80833
	Cell 15	2.57917	2.60667	5.38611
Fig 6F
	Control	Pretreat
	299.434	202.827
	333.01	161.516
	298.317	149.843
	193.713	144.215
	256	150.369
	181.166	315.538
	197.615	259.019
	166.406	159.079
	319.38	297.743
	254.227	187.704
	218.872	100.91
		101.885
		101.066
